# Supplementary material
Source: PubMed Central journal article supplement (PMC3421805)
Supplement: JCM.01142-12_zjm999091876so1.pdf [file JCM.01142-12_zjm999091876so1.pdf]

1

2 **Appendix Table A1.** Non-synonymous single nucleotide polymorphisms (SNPs) detected on  
 3 genes coding for PB1, PB1-F2, PA, NP, NA, M1, M2, NS1 and NEP. For each library,  
 4 corresponding to duck feces (A), early samples in turkeys (B) and late samples in tukeys (C),  
 5 reads were aligned against consensus sequence before SNPs calling. % of reads sharing the  
 6 SNP was determined with a threshold of 5%.

7

8

| PB1 | DNA level         |     | Protein Level           |     |   | A                    | B                    | C                    |
|-----|-------------------|-----|-------------------------|-----|---|----------------------|----------------------|----------------------|
|     | Base Substitution |     | Amino Acid Substitution |     |   | Population ratio (%) | Population ratio (%) | Population ratio (%) |
| G   | 156               | T   | K                       | 52  | N | 0                    | 100                  | 100                  |
| G   | 161               | A   | R                       | 54  | K | 0                    | 100                  | 100                  |
| G   | 166               | A   | A                       | 56  | T | 0                    | 100                  | 100                  |
| C   | 293               | T   | S                       | 98  | F | 0                    | 0                    | 7                    |
| G   | 585               | A   | M                       | 195 | I | 0                    | 100                  | 100                  |
| T   | 962               | A   | M                       | 321 | K | 0                    | 0                    | 8                    |
| A   | 1015              | G   | I                       | 339 | V | 0                    | 0                    | 7                    |
| A   | 1363              | G   | N                       | 463 | D | 0                    | 21                   | 0                    |
| T   | 1483              | C   | F                       | 495 | L | 0                    | 0                    | 5                    |
| C   | 1648              | A   | L                       | 550 | I | 0                    | 100                  | 100                  |
| GGT | 1690              | GTG | G                       | 564 | V | 0                    | 0                    | 14                   |
| CGT | 1750              | CAC | R                       | 584 | H | 0                    | 100                  | 100                  |
| A   | 2081              | G   | N                       | 694 | S | 0                    | 100                  | 100                  |

9

| PB1-F2 | Nucleotide        |   | Protein Level           |    |   | A                    | B                    | C                    |
|--------|-------------------|---|-------------------------|----|---|----------------------|----------------------|----------------------|
|        | Base Substitution |   | Amino Acid Substitution |    |   | Population ratio (%) | Population ratio (%) | Population ratio (%) |
| A      | 11                | G | E                       | 4  | G | 0                    | 100                  | 100                  |
| G      | 62                | T | R                       | 21 | M | 0                    | 100                  | 100                  |
| G      | 65                | A | G                       | 22 | E | 0                    | 100                  | 100                  |
| G      | 67                | A | G                       | 23 | S | 0                    | 100                  | 100                  |
| A      | 77                | G | Q                       | 26 | R | 0                    | 100                  | 100                  |
| T      | 89                | C | L                       | 30 | P | 0                    | 100                  | 100                  |
| T      | 128               | G | L                       | 43 | R | 0                    | 0                    | 6                    |
| C      | 137               | T | T                       | 46 | M | 0                    | 100                  | 100                  |

|   |     |   |   |    |   |   |     |     |
|---|-----|---|---|----|---|---|-----|-----|
| A | 143 | G | Q | 48 | R | 0 | 100 | 100 |
| C | 146 | T | A | 49 | V | 0 | 100 | 100 |
| A | 158 | G | K | 53 | R | 0 | 100 | 100 |
| A | 161 | G | Q | 54 | R | 0 | 100 | 100 |
| G | 170 | A | C | 57 | Y | 0 | 0   | 6   |
| A | 194 | G | K | 65 | R | 0 | 100 | 100 |
| C | 199 | T | P | 67 | S | 0 | 0   | 7   |
| A | 236 | G | Q | 79 | R | 0 | 100 | 98  |
| C | 245 | T | S | 82 | L | 0 | 100 | 100 |

| PA  | Nucleotide        |     | Protein Level           |     |   | A                    | B                    | C                    |
|-----|-------------------|-----|-------------------------|-----|---|----------------------|----------------------|----------------------|
|     | Base Substitution |     | Amino Acid Substitution |     |   | Population ratio (%) | Population ratio (%) | Population ratio (%) |
| C   | 209               | T   | A                       | 70  | V | 0                    | 100                  | 100                  |
| A   | 398               | G   | E                       | 133 | G | 0                    | 0                    | 13                   |
| A   | 1613              | G   | E                       | 538 | G | 0                    | 100                  | 100                  |
| TTC | 1684              | TCG | F                       | 562 | S | 0                    | 11                   | 0                    |
| C   | 1687              | G   | L                       | 563 | V | 0                    | 11                   | 0                    |

| NP | Nucleotide        |  | Protein Level           |  |  | A                    | B                    | C                    |
|----|-------------------|--|-------------------------|--|--|----------------------|----------------------|----------------------|
|    | Base Substitution |  | Amino Acid Substitution |  |  | Population ratio (%) | Population ratio (%) | Population ratio (%) |

| NA | Nucleotide        |   | Protein Level           |     |   | A                    | B                    | C                    |
|----|-------------------|---|-------------------------|-----|---|----------------------|----------------------|----------------------|
|    | Base Substitution |   | Amino Acid Substitution |     |   | Population ratio (%) | Population ratio (%) | Population ratio (%) |
| A  | 175               | C | N                       | 59  | H | 8                    | 0                    | 0                    |
| G  | 1180              | A | V                       | 394 | I | 0                    | 0                    | 38                   |

| M1 | Nucleotide        |   | Protein Level           |     |   | A                    | B                    | C                    |
|----|-------------------|---|-------------------------|-----|---|----------------------|----------------------|----------------------|
|    | Base Substitution |   | Amino Acid Substitution |     |   | Population ratio (%) | Population ratio (%) | Population ratio (%) |
| C  | 503               | T | T                       | 168 | I | <5                   | 0                    | 20                   |

| M2 | Nucleotide        |  | Protein Level           |  |  | A                    | B                    | C                    |
|----|-------------------|--|-------------------------|--|--|----------------------|----------------------|----------------------|
|    | Base Substitution |  | Amino Acid Substitution |  |  | Population ratio (%) | Population ratio (%) | Population ratio (%) |

| NS1 | DNA level         |     | Protein Level           |    |   | A                    | B                    | C                    |
|-----|-------------------|-----|-------------------------|----|---|----------------------|----------------------|----------------------|
|     | Base Substitution |     | Amino Acid Substitution |    |   | Population ratio (%) | Population ratio (%) | Population ratio (%) |
| CAA | 73                | CGG | Q                       | 25 | R | 0                    | 11                   | 0                    |
| A   | 79                | C   | M                       | 27 | L | 5                    | 0                    | 17                   |

|     |     |     |   |     |   |    |    |    |
|-----|-----|-----|---|-----|---|----|----|----|
| A   | 79  | G   | M | 27  | V | 0  | 10 | 0  |
| AAA | 121 | AGG | K | 41  | R | 0  | 9  | 0  |
| T   | 124 | G   | S | 42  | A | <5 | 0  | 16 |
| A   | 130 | G   | R | 44  | G | 0  | 9  | 0  |
| GCG | 178 | ATG | A | 60  | M | 5  | 0  | 17 |
| A   | 381 | C   | K | 127 | N | 10 | 0  | 20 |
| A   | 382 | T   | I | 128 | F | 6  | 0  | 6  |
| G   | 538 | A   | V | 180 | I | 5  | 0  | 0  |
| A   | 571 | T   | T | 191 | S | 5  | 0  | 0  |
| G   | 574 | A   | V | 192 | I | 5  | 0  | 0  |
| GTC | 580 | GCG | V | 194 | A | 5  | 0  | 0  |
| A   | 610 | G   | R | 204 | G | 5  | 0  | 0  |
| G   | 614 | T   | S | 205 | I | 5  | 0  | 0  |
| A   | 619 | G   | N | 207 | D | 5  | 0  | 0  |
| G   | 625 | A   | D | 209 | N | 6  | 0  | 0  |
| AAA | 661 | TAC | K | 221 | T | 5  | 0  | 0  |
| ACA | 673 | CGA | T | 225 | R | 5  | 0  | 0  |
| A   | 676 | G   | I | 226 | V | 5  | 0  | 0  |

| NEP | DNA level         |     | Protein Level           |    |   | A                    | B                    | C                    |
|-----|-------------------|-----|-------------------------|----|---|----------------------|----------------------|----------------------|
|     | Base Substitution |     | Amino Acid Substitution |    |   | Population ratio (%) | Population ratio (%) | Population ratio (%) |
| GGG | 64                | GAA | G                       | 22 | E | 5                    | 0                    | 0                    |
| A   | 77                | T   | E                       | 26 | V | 5                    | 0                    | 0                    |
| G   | 86                | A   | S                       | 29 | N | 14                   | 0                    | 23                   |
| A   | 105               | C   | L                       | 35 | F | 14                   | 0                    | 22                   |
| TCT | 109               | CGT | S                       | 37 | R | 5                    | 0                    | <5                   |
| G   | 116               | A   | R                       | 39 | K | 13                   | 0                    | 22                   |
| GCA | 142               | TCC | A                       | 48 | S | 5                    | 0                    | <5                   |
| GGA | 187               | GCT | G                       | 63 | A | 5                    | 0                    | <5                   |
| A   | 191               | C   | K                       | 64 | T | 5                    | 0                    | <5                   |
| A   | 201               | C   | E                       | 67 | D | 5                    | 0                    | <5                   |
| CAA | 202               | GAG | Q                       | 68 | E | 5                    | 0                    | <5                   |
| G   | 257               | A   | R                       | 86 | K | 8                    | 0                    | 18                   |

1

2

3
